# Supplementary material for: Photoactivation of core–shell titania coated upconversion nanoparticles and their effect on cell death
Source: Royal Society of Chemistry journal article supplement (doi:10.1039/c4tb01169d), 2014-01-01
Supplement: c4tb01169d1.pdf [file c4tb01169d1.pdf]

## Supplementary Information

### Photoactivation of Core-Shell Titania Coated Upconversion Nanoparticles and its Effect on Cell Death

Niagara Muhammad Idris, Sasidharan Swarnalatha Lucky, Zhengquan Li, Kai Huang and Yong Zhang\*

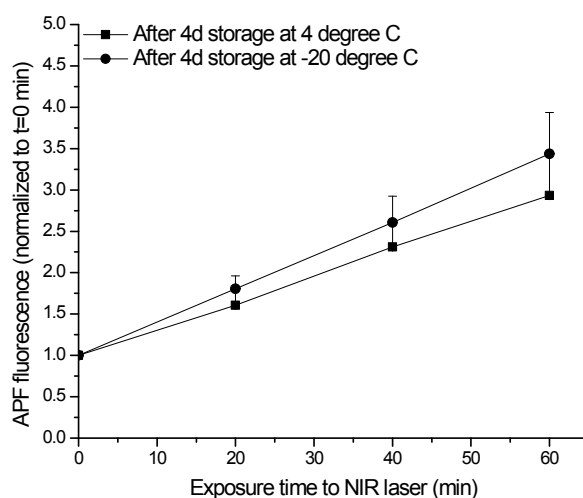

**Figure S1.** ROS production from TiO<sub>2</sub>-UCN stored as dry powder under different conditions. TiO<sub>2</sub>-UCN activity for ROS production under 980 nm NIR irradiation (2.16 W cm<sup>-2</sup>) after storage for 4 days at -20 °C compared to 4 °C as determined by APF fluorescence and plotted as a function of exposure time (t) to the 980 nm NIR laser.  $P > 0.05$  between 4 °C and -20 °C.

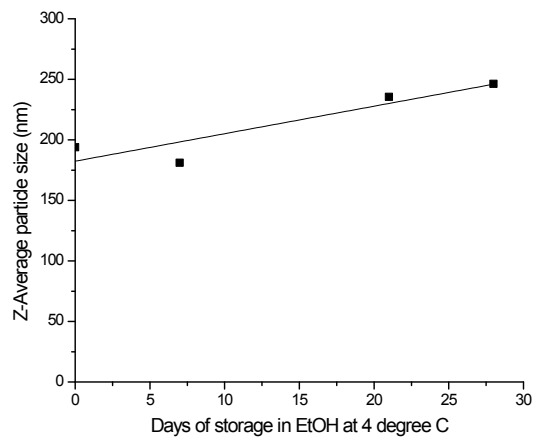

**Figure S2.** Hydrodynamic size of the nanoparticles at different storage days in EtOH at 4 °C as measured by dynamic light scattering. The storage medium, EtOH, was removed and the TiO<sub>2</sub>-UCN was resuspended in water prior to the measurement
